# Supplementary material for: Chunking Constrains Prediction during Language Comprehension
Source: Research Square preprint supplement (doi:10.21203/rs.3.rs-6472973/v1), 2025-05-20
Supplement: Supplementary file 1 [file 2fa7361cbe6980d557c12c5f.pdf]

1

### ***Statistical Cues for Sentence Boundaries***

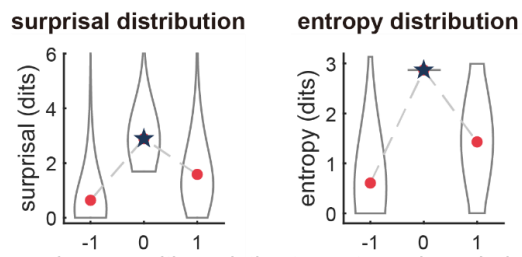

2

morpheme position relative to sentence boundaries

3

**Figure S1. Surprisal and entropy distribution at sentence boundaries for all NP-VP sentences in corpora.**

4

5

6

7

## A Surprisal and Entropy Estimated Based on Human Cloze Probability

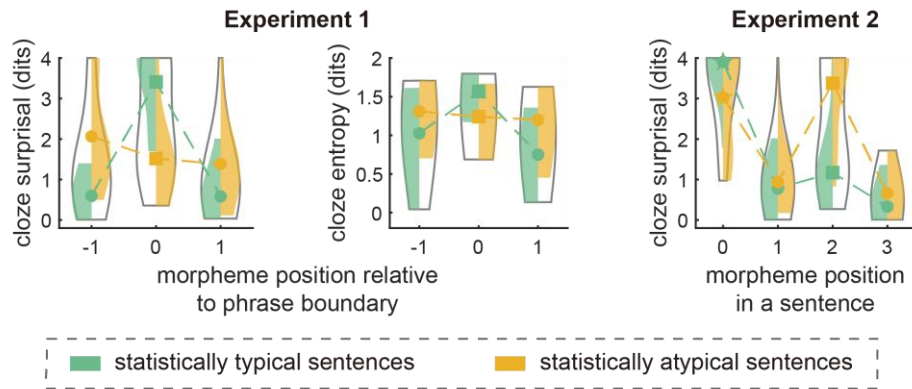

## B Correlation Between Human Cloze Surprisal and GPT Surprisal

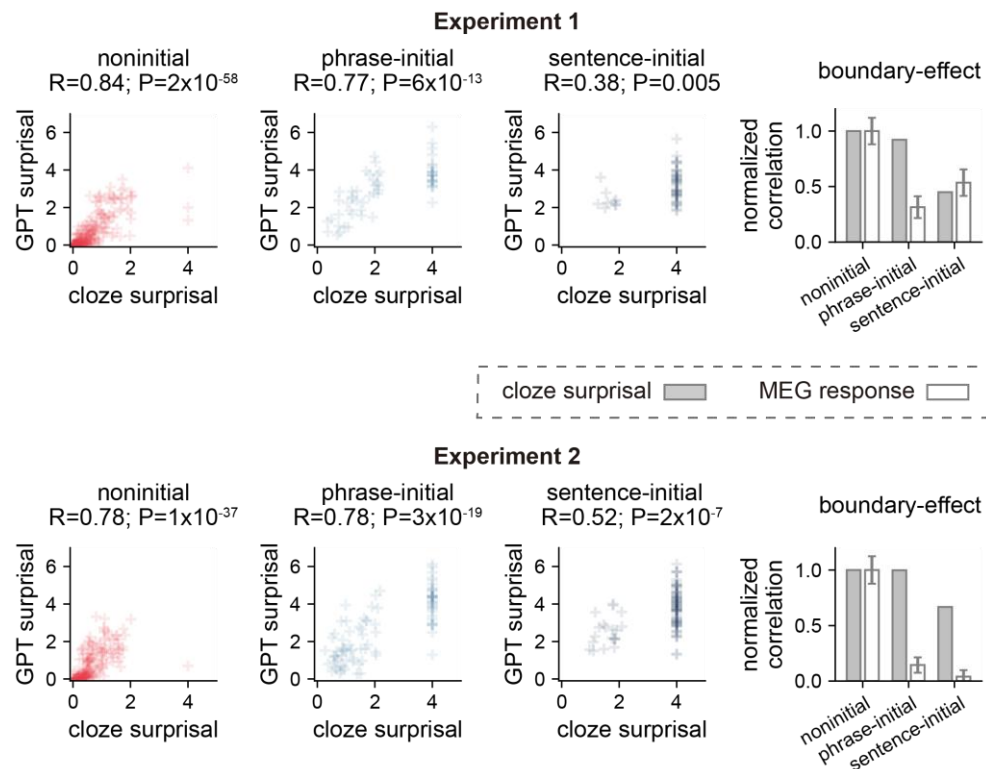

**Figure S2. Human morpheme prediction under a cloze task for materials in Experiments 1 and 2. (A)** Surprisal and entropy estimated based on the cloze probability, for statistically typical and atypical sentences. Results for Experiments 1 and 2 are shown using the same setup in Fig. 2B and Fig. 4B. Results of the cloze task confirm distinctions between statistically typical and atypical sentences. **(B)** Correlation between cloze-probability-based surprisal and GPT surprisal and the influence of chunk boundaries. This analysis mirrors the analysis on the MEG M400c amplitude, except that the M400c amplitude is replaced by the surprisal estimated based on the cloze task. The left three panels show scatter plots for individual morphemes ( $R$ : spearman correlation coefficient;  $P$ : significance level). The rightmost panel shows the correlation normalized based on the correlation of noninitial morphemes. The

correlation is comparable for noninitial and phrase-initial morphemes, and is lower for sentence-initial morphemes. The sentence-boundary effect is also weaker than what is observed in the MEG experiments.

24  
25  
26

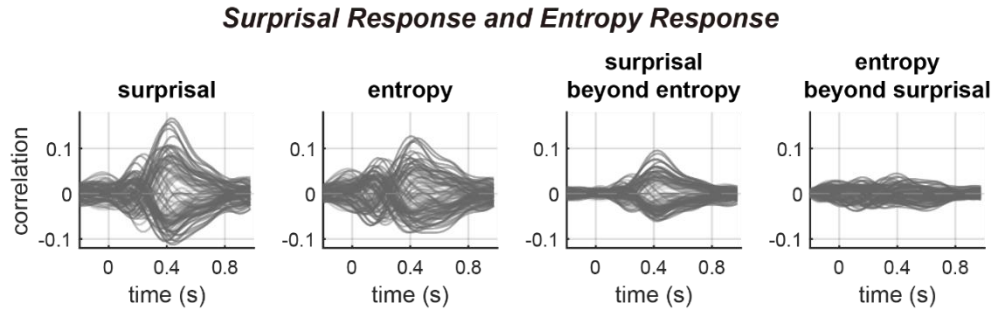

27

**Figure S3. Time-wise correlations characterizing the response to surprisal and entropy.** The first (second) panels show the partial correlations between the neural responses and surprisal (entropy), with surprisal (entropy) of 2 preceding and 2 following morphemes included as co-variables. The third (fourth) panels show the unique contribution of surprisal (entropy) when entropy (surprisal) is included as a co-variable. All plots are averaged across participants. Each curve represents one sensor.

35  
36  
37  
38

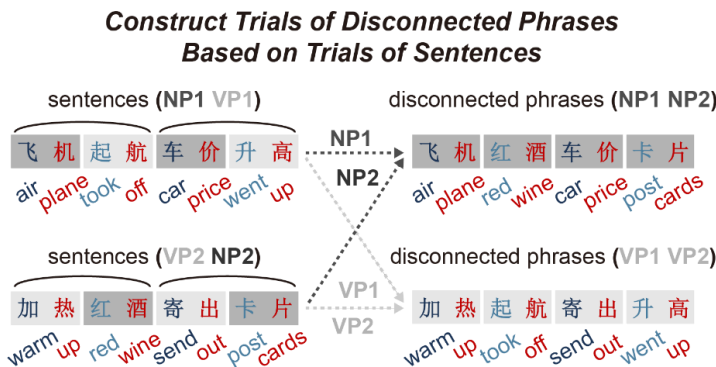

39

**Figure S4. Construction of disconnected-phrase condition.** Trials of disconnected phrases are constructed based on sentence trials: For a NP+VP trial and a VP+NP trial, NPs are rearranged to create a NP trial, while VPs are used to form a VP trial. Both the disconnected-phrase condition and sentence condition use the same set of phrases, and each phrase is presented at the same positions. For instance, “车价 car price” consistently appears as the third phrase in a trial.

46

### Neural-Surprisal Correlation for Single Electrodes

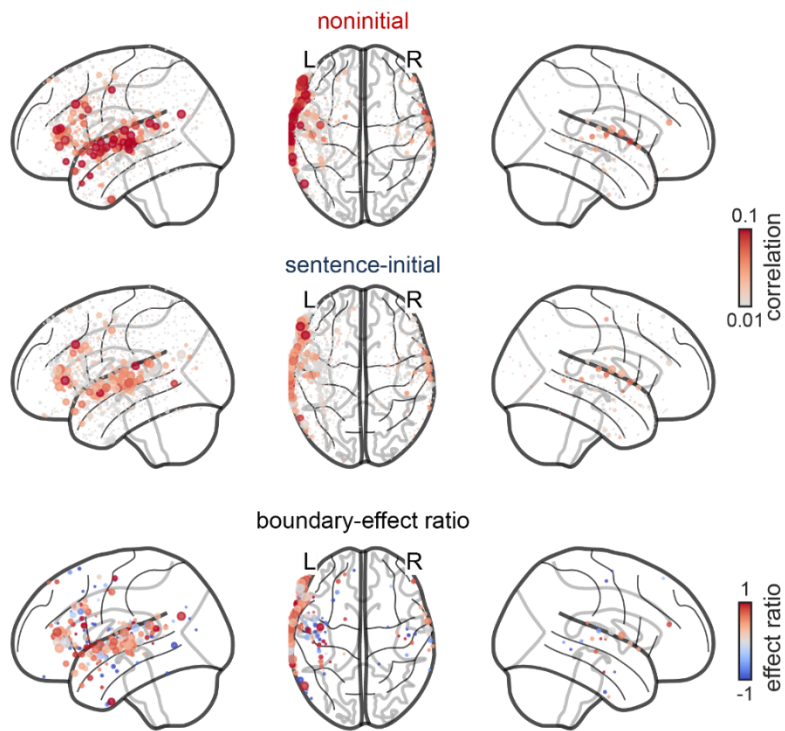

47

48

**Figure S5. Enlarged view of Fig. 7B.**

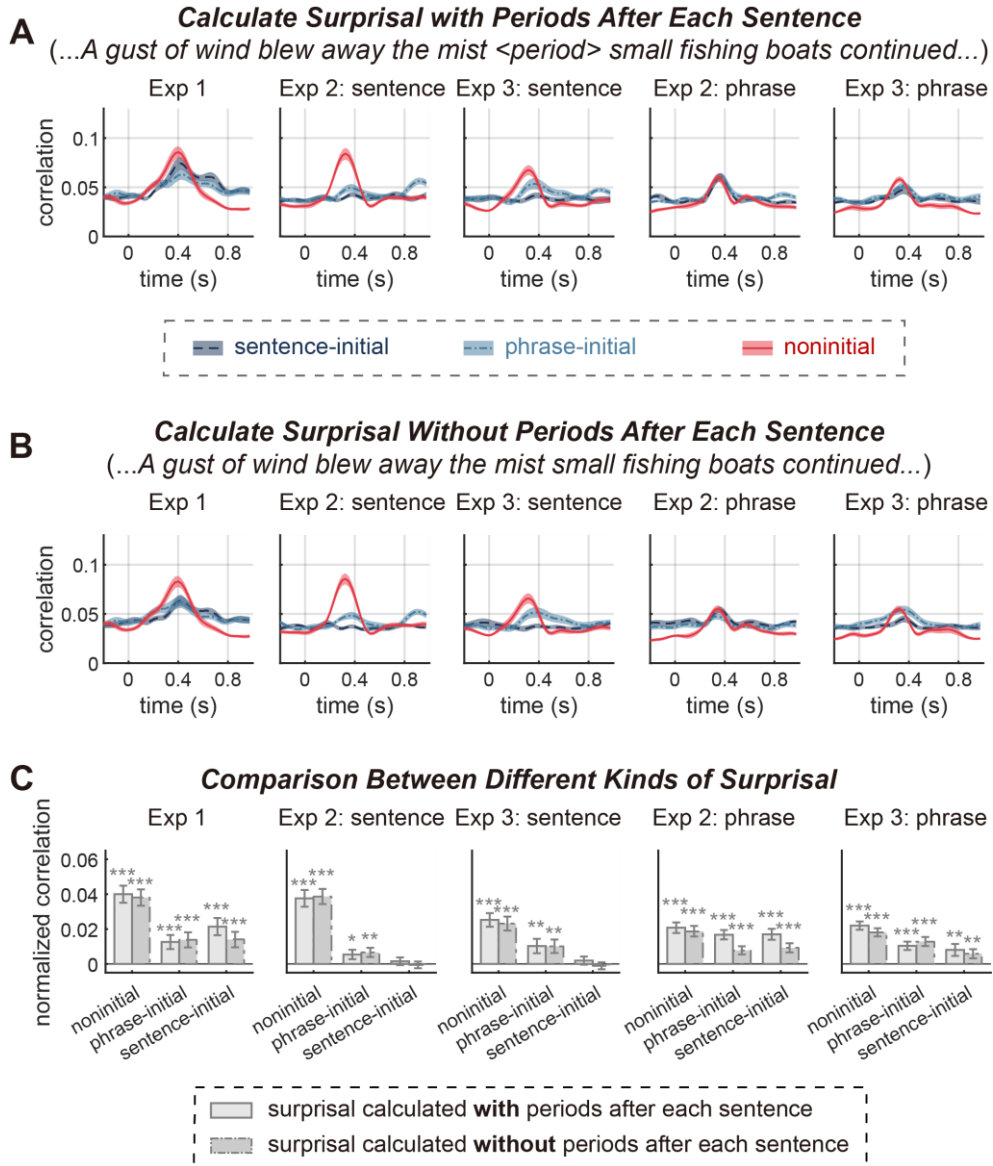

**Figure S6. Surprisal response and chunk boundary effects when surprisal is calculated with (A) or without (B) periods after each sentence.** Examples of inputs to GPT-2 are shown in brackets. (C) Comparison of correlations to neural response for both kinds of surprisal. The patterns observed are similar, with slightly higher correlations when periods are considered. Error bars denote the SEM across participants ( $N = 17$  for Experiment 1;  $N = 19$  for Experiments 2 and 3). Values significantly higher than chance are marked by stars.  $*P < 0.05$ ;  $**P < 0.01$ ;  $***P < 0.001$ .
